# Supplementary material
Source: publisher site journal article supplement (https://www.dovepress.com/get_supplementary_file.php?f=349003.docx)
Supplement: Supplementary file 2 [file get_supplementary_file.php]

**Supplementary Table 1: List of Nd:YAG related complications and associated additional costs or time (for the 1,647 YAG eyes within 3 years).**

| **Procedure Type** | **Number of cases** | **Cost for one case**  **(EUR)** | **Total cost for all cases**  **(EUR)** | **Main consultation time (mins)** | **Additional pre-/post-consultation time (mins)** | **Total time for Hospital HCP (mins)*** | **Total cost for Hospital HCP (EUR) **** |
| --- | --- | --- | --- | --- | --- | --- | --- |
| ***Nd:YAG treatment only*** |  |  |  |  |  |  |  |
| Total for Nd:YAG treatment only | 1647 | €242.48 | € 399,364.56 a | 20 | 10 | 49,410 b | € 30,091.00 c |
| ***Nd:YAG related complications within 6 months after YAG treatment*** |  |  |  |  |  |  |  |
| Cystoid macular oedema | 11 | €668.33 | € 7,351.63 | 60 | 0 | 660 | €401.94 |
| Endophthalmitis | 2 | €1138.54 | € 2,277.08 | 60 | 20 | 160 | €97.44 |
| Hyphaema | 1 | €80.04 | € 80.04 | 20 | 20 | 40 | €24.36 |
| IOL decentered / subluxed | 4 | €1138.54 | € 4,554.16 | 90 | 20 | 440 | €267.96 |
| Macular hole | 5 | €1248.49 | € 6,242.45 | 90 | 20 | 550 | €334.95 |
| Posterior vitreous detachment | 36 | €80.04 | € 2,881.44 | 20 | 20 | 1,440 | €876.96 |
| Raised Intraocular pressure | 5 | €80.04 | € 400.20 | 20 | 20 | 200 | €121.80 |
| Reduction in vision | 10 | €80.04 | € 800.40 | 20 | 20 | 400 | €243.60 |
| Retinal detachment | 6 | €1171.52 | € 7,029.12 | 90 | 20 | 660 | €401.94 |
| Retinal tear | 1 | €217.48 | € 217.48 | 30 | 20 | 50 | €30.45 |
| Uveitis (Iridocyclitis) | 1 | €149.97 | € 149.97 | 20 | 20 | 40 | €24.36 |
| Total for all complications | 82 | - | € 31,984.00 | - | - | 4,640 | €2825.76 |
| ***Nd:YAG treatment and complications*** |  |  |  |  |  |  |  |
| Total for all Nd:YAG cases, including complications *** | 1647 | - | € 431,348.56 | - | - | 54050 | € 32,916.76 |
| Average per Nd:YAG case, including complications **** | - | - | €261.90 | - | - | 32.82 | € 19.99 |

Note: * Time for Hospital HCP = (Consultation time + Additional consultation time) number of cases

** cost of specialist per minute is 0.609 EURO, that is, cost for Hospital HCP = Time for Hospital HCP 0.609

*** Total for Nd:YAG with complications = Total for Nd:YAG treatment only + Total for all complications (except for number of cases)

**** Average cost per Nd:YAG with complications = Total for Nd:YAG with complications /number of cases

a) each YAG case cost 242.48 EURO; b) each YAG case takes HCP 30 mins; c) each YAG case costs HCP 18.27 EURO per minute. Complications are reported for within 6 months after Nd:YAG
